# Supplementary material for: Odoriferous Defensive Stink Gland Transcriptome to Identify Novel Genes Necessary for Quinone Synthesis in the Red Flour Beetle, Tribolium castaneum
Source: PLoS Genet. 2013 Jul 11;9(7):e1003596. doi: 10.1371/journal.pgen.1003596 (PMC3708791; doi:10.1371/journal.pgen.1003596)
Supplement: Dataset S4 — Annotations and gland transcriptomic expression levels of quinone synthesis-related genes, such as glucosidases (Glu), phenol oxidases (PO) and peroxidases (Per). For abbreviations see Table 1. (XLSX) [file pgen.1003596.s004.xlsx]

## Sheet: Glu
TC-No.	GI	Length	Accession No.	EST?	Name	CDD	NCBI link	LOC	Remarks	Identical with GI, Accession No.
TC000223	270001404	458aa	EEZ97851.1	EST	hypothetical protein TcasGA2_TC000223, similar to xtp3-transactivated protein b	CDD:208545, /note="Glucosidase II beta subunit-like protein; cl06793"; CDD:208545…	http://www.ncbi.nlm.nih.gov/protein/EEZ97851.1	LOC659968		91078056, XP_971325.1, similar to xtp3-transactivated protein b. EST
TC000537	189234578	520aa	XP_974655.2		similar to glucosidase 2 subunit beta	CDD:193472, Glucosidase II beta subunit-like; pfam12999. ….	http://www.ncbi.nlm.nih.gov/protein/XP_974655.2	LOC663522	Different starting point in GLEAN-prediction
TC000537	270001672	467aa	EEZ98119.1		hypothetical protein TcasGA2_TC000537	CDD:193472, Glucosidase II beta subunit-like; pfam12999; CDD:208857, /region_name="EFh", /note="EF-hand, calcium binding motif; A diverse superfamily of calcium sensors and calcium signal modulators; most examples in this alignment model have 2 active canonical EF hands. Ca2+ binding induces a conformational change in the EF-hand motif, leading to...; cl08302"	http://www.ncbi.nlm.nih.gov/protein/EEZ98119.1
TC000571	270001699	843aa	EEZ98146.1		hypothetical protein TcasGA2_TC000571	CDD:133123, region_name="GH31_glucosidase_KIAA1161"; CDD:182624, /region_name="PRK10658", /note="putative alpha-glucosidase; Provisional"	http://www.ncbi.nlm.nih.gov/protein/EEZ98146.1	LOC661710		189234537, XP_972949.2
TC002741	270003498	988aa	EEZ99945.1		hypothetical protein TcasGA2_TC002741	CDD:31690, /region_name="COG1501", /note="Alpha-glucosidases, family 31 of glycosyl hydrolases [Carbohydrate transport and metabolism]"; CDD:205975, /region_name="Gal_mutarotas_2", /note="Galactose mutarotase-like; pfam13802"; CDD:133133, /region_name="GH31_MGAM_SI_GAA", /note="This family includes the following three closely related glycosyl hydrolase family 31 (GH31) enzymes: maltase-glucoamyla…	http://www.ncbi.nlm.nih.gov/protein/EEZ99945.1
TC002741	91079350	1011aa	XP_969694.1		similar to acid alpha-glucosidase	CDD:31690, /region_name="COG1501", /note="Alpha-glucosidases, family 31 of glycosyl hydrolases [Carbohydrate transport and metabolism]"; CDD:205975, /region_name="Gal_mutarotas_2", /note="Galactose mutarotase-like; pfam13802"; CDD:133133, /region_name="GH31_MGAM_SI_GAA", /note="This family includes the following three closely related glycosyl hydrolase family 31 (GH31) enzymes: maltase-glucoamyla…	http://www.ncbi.nlm.nih.gov/protein/XP_969694.1	LOC658192	Conserved. Some pathways. 23AA longer than GLEAN.	270003498, EEZ99945.1
TC002859	189235378	637aa	XP_968811.2		similar to neutral alpha-glucosidase ab precursor (glucosidase ii alpha subunit) (alpha glucosidase 2), partial	CDD:133134, /region_name="GH31_GANC_GANAB_alpha" /note="This family includes the closely related glycosyl hydrolase family 31 (GH31) isozymes, neutral alpha-glucosidase C (GANC) and the alpha subunit of heterodimeric neutral alpha-glucosidase AB (GANAB). Initially distinguished on the basis of differences in...; cd06603"	http://www.ncbi.nlm.nih.gov/protein/XP_968811.2	LOC657250	59aa longer than TC.	>gi|270003603|gb|EFA00051.1| hypothetical protein TcasGA2_TC002859
TC002859	270003603	578aa	EFA00051.1		hypothetical protein TcasGA2_TC002859	CDD:133134, /region_name="GH31_GANC_GANAB_alpha"; CDD:205975, /region_name="Gal_mutarotas_2", /note="Galactose mutarotase-like; pfam13802".	http://www.ncbi.nlm.nih.gov/protein/EFA00051.1
TC002860	270003604	907aa	EFA00052.1	EST	hypothetical protein TcasGA2_TC002860; similar to CG14476 CG14476-PB	CDD:31690, /region_name="COG1501", /note="Alpha-glucosidases, family 31 of glycosyl hydrolases [Carbohydrate transport and metabolism]"; CDD:205975, /region_name="Gal_mutarotas_2", /note="Galactose mutarotase-like; pfam13802"; CDD:133134, /region_name="GH31_GANC_GANAB_alpha".	http://www.ncbi.nlm.nih.gov/protein/EFA00052.1	LOC657174	Conserved in a lot of species, pathway info available	189235376, XP_968738.2
TC004953	270002627	845aa	EEZ99074.1	EST	hypothetical protein TcasGA2_TC004953; similar to neutral alpha-glucosidase ab [Tribolium castaneum]	CDD:209304, /region_name="GH31", /note="The enzymes of glycosyl hydrolase family 31 (GH31) occur in prokaryotes, eukaryotes, and archaea with a wide range of hydrolytic activities, including alpha-glucosidase (glucoamylase and sucrase-isomaltase), alpha-xylosidase, 6-alpha-glucosyltransferase; cl11402"; CDD:206839, /region_name="Trefoil", /note="P or trefoil or TFF domain; Trefoil factor family d…	http://www.ncbi.nlm.nih.gov/protein/EEZ99074.1	LOC657390		91076606, XP_968946.1, similar to neutral alpha-glucosidase ab [Tribolium castaneum]. EST
TC007420	270005370	442aa	EFA01818.1		hypothetical protein TcasGA2_TC007420; similar to alpha-galactosidase/alpha-n-acetylgalactosaminidase	CDD:209304, /region_name="GH31", /note="The enzymes of glycosyl hydrolase family 31 (GH31) occur in prokaryotes, eukaryotes, and archaea with a wide range of hydrolytic activities, including alpha-glucosidase (glucoamylase and sucrase-isomaltase), alpha--xylosidase, 6-alpha-glucosyltransferase; cl11402".	http://www.ncbi.nlm.nih.gov/protein/EFA01818.1	LOC663249	Some pathways	91080949, XP_974398.1, similar to alpha-galactosidase/alpha-n-acetylgalactosaminidase
TC008276	270006118	630aa	EFA02566.1		hypothetical protein TcasGA2_TC008276	CDD:133123, region_name="GH31_glucosidase_KIAA1161"; CDD:182624, /region_name="PRK10658", /note="putative alpha-glucosidase; Provisional"	http://www.ncbi.nlm.nih.gov/protein/EFA02566.1
TC008276	91081385	628aa	XP_972326.1	EST	similar to GA11275-PA	CDD:133123, region_name="GH31_glucosidase_KIAA1161"	http://www.ncbi.nlm.nih.gov/protein/XP_972326.1	LOC661044	Conserved. NO visible differs between GLEAN and RefSeq.
TC008357	270006188	553aa	EFA02636.1		hypothetical protein TcasGA2_TC008357	CDD:200467, /note="Alpha amylase catalytic domain found in maltase (also known as alpha glucosidase) and related proteins; cd11328"; CDD:162843, /region_name="trehalose_treC", /note="alpha,alpha-phosphotrehalase; TIGR02403", /db_xref="CDD:162843".	http://www.ncbi.nlm.nih.gov/protein/EFA02636.1
TC008357	91081575	575aa	XP_975220.1	EST	similar to maltase 1	CDD:200467, /note="Alpha amylase catalytic domain found in maltase (also known as alpha glucosidase) and related proteins; cd11328"; CDD:162843, /region_name="trehalose_treC", /note="alpha,alpha-phosphotrehalase; TIGR02403", /db_xref="CDD:162843"	http://www.ncbi.nlm.nih.gov/protein/XP_975220.1	LOC664111	Some pathways. Longer than GLEAN.	270006188, EFA02636.1, hypothetical protein TcasGA2_TC008357
TC008358	270006189	575aa	EFA02637.1	EST	hypothetical protein TcasGA2_TC008358; similar to GA13362-PA	CDD:200467, /note="Alpha amylase catalytic domain found in maltase (also known as alpha glucosidase) and related proteins; cd11328"; CDD:162843, /region_name="trehalose_treC", /note="alpha,alpha-phosphotrehalase; TIGR02403", /db_xref="CDD:162843".	http://www.ncbi.nlm.nih.gov/protein/EFA02637.1	LOC664120		91081577, XP_975228.1, similar to GA13362-PA, EST
TC009634	270010255	404aa	EFA06703.1		hypothetical protein TcasGA2_TC009634	CDD:209304, /region_name="GH31", /note="The enzymes of glycosyl hydrolase family 31 (GH31) occur in prokaryotes, eukaryotes, and archaea with a wide range of hydrolytic activities, including alpha-glucosidase (glucoamylase and sucrase-isomaltase), alpha--xylosidase, 6-alpha-glucosyltransferase; cl11402".	http://www.ncbi.nlm.nih.gov/protein/EFA06703.1
TC009634	189238968	406aa	XP_973339.2		similar to AGAP005846-PA	CDD:209304, /region_name="GH31", /note="The enzymes of glycosyl hydrolase family 31 (GH31) occur in prokaryotes, eukaryotes, and archaea with a wide range of hydrolytic activities, including alpha-glucosidase (glucoamylase and sucrase-isomaltase), alpha--xylosidase, 6-alpha-glucosyltransferase; cl11402".	http://www.ncbi.nlm.nih.gov/protein/XP_973339.2	LOC662129	2AA longer than GLEAN
TC009635	270010256	432aa	EFA06704.1		hypothetical protein TcasGA2_TC009635	CDD:209304, /region_name="GH31", /note="The enzymes of glycosyl hydrolase family 31 (GH31) occur in prokaryotes, eukaryotes, and archaea with a wide range of hydrolytic activities, including alpha-glucosidase (glucoamylase and sucrase-isomaltase), alpha--xylosidase, 6-alpha-glucosyltransferase; cl11402".	http://www.ncbi.nlm.nih.gov/protein/EFA06704.1
TC009635	91086279	407aa	XP_973373.1	EST	similar to alpha-galactosidase/alpha-n-acetylgalactosaminidase	CDD:209304, /region_name="GH31", /note="The enzymes of glycosyl hydrolase family 31 (GH31) occur in prokaryotes, eukaryotes, and archaea with a wide range of hydrolytic activities, including alpha-glucosidase (glucoamylase and sucrase-isomaltase), alpha--xylosidase, 6-alpha-glucosyltransferase; cl11402".	http://www.ncbi.nlm.nih.gov/protein/XP_973373.1	LOC662163	Conserved. Second and third exons are combined to one in GLEAN.
TC009636	270010257	385aa	EFA06705.1		hypothetical protein TcasGA2_TC009636	CDD:209304, /region_name="GH31", /note="The enzymes of glycosyl hydrolase family 31 (GH31) occur in prokaryotes, eukaryotes, and archaea with a wide range of hydrolytic activities, including alpha-glucosidase (glucoamylase and sucrase-isomaltase), alpha--xylosidase, 6-alpha-glucosyltransferase; cl11402".	http://www.ncbi.nlm.nih.gov/protein/EFA06705.1
TC009636	91086281	411aa	XP_973404.1	EST	similar to CG7997 CG7997-PA	CDD:209304, /region_name="GH31", /note="The enzymes of glycosyl hydrolase family 31 (GH31) occur in prokaryotes, eukaryotes, and archaea with a wide range of hydrolytic activities, including alpha-glucosidase (glucoamylase and sucrase-isomaltase), alpha--xylosidase, 6-alpha-glucosyltransferase; cl11402".	http://www.ncbi.nlm.nih.gov/protein/XP_973404.1	LOC662197	Conserved, some pathways. Longer than GLEAN.	270010257, EFA06705.1
TC011354	270001063	815aa	EEZ97510.1	EST	hypothetical protein TcasGA2_TC011354; similar to CG1597 CG1597-PA	CDD:190561, /region_name="Glyco_hydro_63", /note="Mannosyl oligosaccharide glucosidase; pfam03200".	http://www.ncbi.nlm.nih.gov/protein/EEZ97510.1	LOC661492	Some pathways	91091700, XP_972740.1, similar to CG1597 CG1597-PA. EST
TC016211	270001219	495aa	EEZ97666.1	EST	hypothetical protein TcasGA2_TC016211	CDD:205975, /region_name="Gal_mutarotas_2", /note="Galactose mutarotase-like; pfam13802"; CDD:133134, /region_name="GH31_GANC_GANAB_alpha".	http://www.ncbi.nlm.nih.gov/protein/EEZ97666.1
TC016211 + TC016212	91092258	751aa	XP_967103.1	EST	similar to neutral alpha-glucosidase AB	CDD:133134, /region_name="GH31_GANC_GANAB_alpha"; CDD:205975, /region_name="Gal_mutarotas_2", /note="Galactose mutarotase-like; pfam13802".	http://www.ncbi.nlm.nih.gov/protein/XP_967103.1	LOC655466	Including two Gleans
TC016212	270001220	321aa	EEZ97667.1	EST	hypothetical protein TcasGA2_TC016212	CDD:209304, /region_name="GH31", /note="The enzymes of glycosyl hydrolase family 31 (GH31) occur in prokaryotes, eukaryotes, and archaea with a wide range of hydrolytic activities, including alpha-glucosidase (glucoamylase and sucrase-isomaltase), alpha--xylosidase, 6-alpha-glucosyltransferase; cl11402".	http://www.ncbi.nlm.nih.gov/protein/EEZ97667.1
TC016218	270001226	950aa	EEZ97673.1		hypothetical protein TcasGA2_TC016218	CDD:205975, /region_name="Gal_mutarotas_2", /note="Galactose mutarotase-like; pfam13802"; CDD:133134, /region_name="GH31_GANC_GANAB_alpha".	http://www.ncbi.nlm.nih.gov/protein/EEZ97673.1
TC016218	189241705	845aa	XP_967022.2	EST	similar to GA13011-PA	CDD:133134, /region_name="GH31_GANC_GANAB_alpha"; CDD:205975, /region_name="Gal_mutarotas_2", /note="Galactose mutarotase-like; pfam13802".	http://www.ncbi.nlm.nih.gov/protein/XP_967022.2	LOC655389	Glean is different
TC016367	270010940	818aa	EFA07388.1	EST	hypothetical protein TcasGA2_TC016367; similar to bile acid beta-glucosidase, putative	CDD:152650, /note="beta-Glucocerebrosidase 2 N terminal; pfam12215"; CDD:34072, /note="Predicted bile acid beta-glucosidase [Carbohydrate transport and metabolism]"; CDD:207482, /note="Bacterial alpha-L-rhamnosidase; cl01801".	http://www.ncbi.nlm.nih.gov/protein/EFA07388.1	LOC655239		189239183, XP_966847.2, similar to bile acid beta-glucosidase, putative. EST.
19 in total except the repeats.

## Sheet: Glu-Exp
Gene Name	s1-ctl_reads	s1-ctl_depth	s2-tthr_reads	s2-tthr_depth	s3-mthr_reads	s3-mthr_depth	s4-fthr_reads	s4-fthr_depth	s5-mabd_reads	s5-mabd_depth	s6-fabd_reads	s6-fabd_depth	FC(s3/s1)	FC(s4/s1)	FC(s5/s1)	FC(s6/s1)	FC(s2/s1)
TC000223	1454	40.1249	3949	108.977	3692	101.885	3651	100.754	4359	120.292	4852	133.897	1.34438	1.32826	1.58397	1.73855	1.44146
TC000537	1417	38.3519	2146	58.0826	2409	65.2009	2314	62.6296	2398	64.9031	1925	52.1011	0.765595	0.707549	0.758992	0.442019	0.59881
TC000571	705	10.5806	273	4.09716	258	3.87204	259	3.88705	332	4.98262	2053	30.8112	-1.45025	-1.44467	-1.08644	1.54204	-1.36872
TC002741	844	10.8096	1253	16.0479	933	11.9494	885	11.3347	1185	15.1769	1137	14.5622	0.144634	0.0684344	0.489572	0.429917	0.570072
TC002859	481	10.5227	519	11.3541	531	11.6166	454	9.93207	504	11.0259	792	17.3264	0.142675	-0.0833445	0.0673869	0.719464	0.109698
TC002860	3096	43.1894	3755	52.3825	2733	38.1256	2441	34.0521	2913	40.6366	5383	75.0932	-0.17992	-0.342933	-0.0878998	0.798005	0.278407
TC004953	1916	28.6872	1	0.014972	21	0.314421	20	0.299448	19	0.284476	29	0.4342	-6.51156	-6.58196	-6.65595	-6.0459	-10.9039
TC007420	1326	37.9142	761	21.7592	596	17.0414	472	13.4959	693	19.8149	797	22.7886	-1.1537	-1.49022	-0.936154	-0.734429	-0.801112
TC008276	14152	284.087	182	3.65346	276	5.54041	261	5.2393	194	3.89435	85	1.70629	-5.68019	-5.76081	-6.18881	-7.37933	-6.28092
TC008357	11606	265.36	269	6.15042	258	5.89892	196	4.48135	13	0.297232	9	0.205776	-5.49136	-5.88787	-9.80214	-10.3327	-5.43112
TC008358	9933	218.434	126	2.77083	31	0.681713	27	0.59375	5	0.109954	2	0.043981	-8.32382	-8.52313	-10.9561	-12.278	-6.30073
TC009634	384	12.0099	0	0	0	0	1	0.031276	37	1.1572	3	0.093827	-	-8.58495	-3.37551	-7	-
TC009635	377	11.0285	5	0.146266	2	0.058507	0	0	1	0.029253	0	0	-7.55841	-	-8.55843	-	-6.2365
TC009636	245	8.03972	41	1.34542	41	1.34542	49	1.60794	4780	156.857	1530	50.2073	-2.57909	-2.32193	4.28616	2.64268	-2.57909
TC011354	818	12.6977	1026	15.9265	969	15.0417	950	14.7467	1145	17.7737	1632	25.3333	0.244396	0.215827	0.485175	0.996468	0.326858
TC016211	1654	42.2392	7	0.178763	6	0.153226	3	0.076613	2	0.051075	4	0.102151	-8.10678	-9.10678	-9.69175	-8.69174	-7.88439
TC016212	1249	49.1325	23	0.904762	15	0.590062	9	0.354037	9	0.354037	9	0.354037	-6.37967	-7.11663	-7.11663	-7.11663	-5.763
TC016218	5001	66.6099	46	0.612688	16	0.213109	11	0.146512	0	0	3	0.039958	-8.288	-8.82857	-	-10.703	-6.76444
TC016367	1515	23.431	1957	30.267	1520	23.5083	1516	23.4465	1872	28.9524	1617	25.0085	0.00475359	0.000951959	0.305263	0.0940019	0.369326
19 in total excepts the repeats.
PS: the highlighted ones are the ones with higher reads in all the wild type glands

## Sheet: PO
TC-No.	GI	Length (aa)	Accession No.	EST?	Name	CDD	NCBI link	Gene Symbol	Remarks	Identical with GI, Accession No.
TC000325	70999572	682aa	AAX84204.1		pro-phenol oxidase subunit 1	CDD:202742, /region_name="Hemocyanin_C", /note="Hemocyanin, ig-like domain; pfam03723"; CDD:201186, /region_name="Hemocyanin_M", /note="Hemocyanin, copper containing domain; pfam00372"; CDD:202741, /region_name="Hemocyanin_N", /note="Hemocyanin, all-alpha domain; pfam03722".	http://www.ncbi.nlm.nih.gov/protein/86515332	Tyr1		86515332, NP_001034493.1, pro-phenol oxidase subunit 1; 270002742, EEZ99189.1, hypothetical protein TcasGA2_TC000325.
TC000821	86515378	697	NP_001034514.1		laccase 1	CDD:209309, /region_name="COX2", /note="Cytochrome C oxidase subunit II, periplasmic domain; cl11412".	http://www.ncbi.nlm.nih.gov/protein/NP_001034514.1	Lac1		270001917, EEZ98364.1, hypothetical protein TcasGA2_TC000821; 68137818, AAX84206.1, laccase 1.
TC005374	270012696	695	EFA09144.1		hypothetical protein TcasGA2_TC005374; hexamerin 3 precursor.	CDD:202742, /region_name="Hemocyanin_C", /note="Hemocyanin, ig-like domain; pfam03723"; CDD:201186, /region_name="Hemocyanin_M", /note="Hemocyanin, copper containing domain; pfam00372"; CDD:202741, /region_name="Hemocyanin_N", /note="Hemocyanin, all-alpha domain; pfam03722".	http://www.ncbi.nlm.nih.gov/protein/EFA09144.1	HEX3		282400158, NP_001164202.1, hexamerin 3 precursor.
TC005375	270012697	701	EFA09145.1		hypothetical protein TcasGA2_TC005375; hexamerin 4 precursor.	CDD:202742, /region_name="Hemocyanin_C", /note="Hemocyanin, ig-like domain; pfam03723"; CDD:201186, /region_name="Hemocyanin_M", /note="Hemocyanin, copper containing domain; pfam00372"; CDD:202741, /region_name="Hemocyanin_N", /note="Hemocyanin, all-alpha domain; pfam03722".	http://www.ncbi.nlm.nih.gov/protein/EFA09145.1	HEX4		282720989, NP_001164245.1, hexamerin 4 precursor.
TC005376	270012698	748	EFA09146.1	VALIDATED REFSEQ	hypothetical protein TcasGA2_TC005376; arylphorin precursor.	CDD:202742, /region_name="Hemocyanin_C", /note="Hemocyanin, ig-like domain; pfam03723"; CDD:201186, /region_name="Hemocyanin_M", /note="Hemocyanin, copper containing domain; pfam00372"; CDD:202741, /region_name="Hemocyanin_N", /note="Hemocyanin, all-alpha domain; pfam03722".	http://www.ncbi.nlm.nih.gov/protein/EFA09146.1	HEX1A		167466203, NP_001107851.1, arylphorin precursor. VALIDATED REFSEQ.
TC005377	270012699	769	EFA09147.1		hypothetical protein TcasGA2_TC005377; hexamerin 1B precursor	CDD:202742, /region_name="Hemocyanin_C", /note="Hemocyanin, ig-like domain; pfam03723"; CDD:201186, /region_name="Hemocyanin_M", /note="Hemocyanin, copper containing domain; pfam00372"; CDD:202741, /region_name="Hemocyanin_N", /note="Hemocyanin, all-alpha domain; pfam03722".	http://www.ncbi.nlm.nih.gov/protein/EFA09147.1	HEX1B		283046829, NP_001164358.1, hexamerin 1B precursor.
TC006515	270012805	703	EFA09253.1		hypothetical protein TcasGA2_TC006515; hexamerin 5 precursor.	CDD:202742, /region_name="Hemocyanin_C", /note="Hemocyanin, ig-like domain; pfam03723"; CDD:201186, /region_name="Hemocyanin_M", /note="Hemocyanin, copper containing domain; pfam00372"; CDD:202741, /region_name="Hemocyanin_N", /note="Hemocyanin, all-alpha domain; pfam03722".	http://www.ncbi.nlm.nih.gov/protein/EFA09253.1	HEX5		282400162, NP_001164204.1, hexamerin 5 precursor.
TC006769	270012818	698	EFA09266.1	VALIDATED REFSEQ	hypothetical protein TcasGA2_TC006769; hexamerin 2 precursor	CDD:202742, /region_name="Hemocyanin_C", /note="Hemocyanin, ig-like domain; pfam03723"; CDD:201186, /region_name="Hemocyanin_M", /note="Hemocyanin, copper containing domain; pfam00372"; CDD:202741, /region_name="Hemocyanin_N", /note="Hemocyanin, all-alpha domain; pfam03722".	http://www.ncbi.nlm.nih.gov/protein/EFA09266.1	HEX2		283046776, NP_001164335.1, hexamerin 2 precursor, VALIDATED REFSEQ
TC010489	193126110	717	AAX84202.2		laccase 2A	CDD:209309, /region_name="COX2", /note="Cytochrome C oxidase subunit II, periplasmic domain; cl11412"; CDD:163245, /region_name="ascorbase", /note="L-ascorbate oxidase, plant type; TIGR03388".	http://www.ncbi.nlm.nih.gov/protein/193126110	Lac2, ChLG3:19031934..19084315	Conserved. /function="para-diphenol:dioxygen oxidoreductase". ChLG3:19034315..19081934. 2A and 2B have an identity of 92% (A to B, 653/711)	193211474, NP_001034487, laccase 2 precursor.
TC010489	193126101	713	AAX84203.2		laccase 2B	CDD:209309, /region_name="COX2", /note="Cytochrome C oxidase subunit II, periplasmic domain; cl11412"; CDD:163245, /region_name="ascorbase", /note="L-ascorbate oxidase, plant type; TIGR03388".	http://www.ncbi.nlm.nih.gov/protein/AAX84203.2	Lac2
TC010490	270004719	264	EFA01167.1		hypothetical protein TcasGA2_TC010490	CDD:209309, /region_name="COX2", /note="Cytochrome C oxidase subunit II, periplasmic domain; cl11412".	http://www.ncbi.nlm.nih.gov/protein/270004719
TC014907	270009214	683	EFA05662.1		hypothetical protein TcasGA2_TC014907	CDD:202742, /region_name="Hemocyanin_C", /note="Hemocyanin, ig-like domain; pfam03723"; CDD:201186, /region_name="Hemocyanin_M", /note="Hemocyanin, copper containing domain; pfam00372"; CDD:202741, /region_name="Hemocyanin_N", /note="Hemocyanin, all-alpha domain; pfam03722".	http://www.ncbi.nlm.nih.gov/protein/EFA05662.1
TC014907	189238603	754	XP_967179.2	EST	similar to pro-phenol oxidase subunit 2	CDD:202742, /region_name="Hemocyanin_C", /note="Hemocyanin, ig-like domain; pfam03723"; CDD:201186, /region_name="Hemocyanin_M", /note="Hemocyanin, copper containing domain; pfam00372"; CDD:202741, /region_name="Hemocyanin_N", /note="Hemocyanin, all-alpha domain; pfam03722".	http://www.ncbi.nlm.nih.gov/protein/XP_967179.2	PPO3, LOC655533	71AA longer than GLEAN.	270009214, EFA05662.1, hypothetical protein TcasGA2_TC014907.
TC015848	270009192	332	EFA05640.1		hypothetical protein TcasGA2_TC015848	CDD:201186, /region_name="Hemocyanin_M", /note="Hemocyanin, copper containing domain; pfam00372"; CDD:202741, /region_name="Hemocyanin_N", /note="Hemocyanin, all-alpha domain; pfam03722".	http://www.ncbi.nlm.nih.gov/protein/EFA05640.1
TC015848 + TC015849	70999576	683aa	AAX84205.1		pro-phenol oxidase subunit 2	CDD:202742, /region_name="Hemocyanin_C", /note="Hemocyanin, ig-like domain; pfam03723"; CDD:201186, /region_name="Hemocyanin_M", /note="Hemocyanin, copper containing domain; pfam00372"; CDD:202741, /region_name="Hemocyanin_N", /note="Hemocyanin, all-alpha domain; pfam03722".	http://www.ncbi.nlm.nih.gov/protein/AAX84205.1	Tyr2		86515394, NP_001034522.1, pro-phenol oxidase subunit 2.
TC015849	270009307	362	EFA05755.1		hypothetical protein TcasGA2_TC015849	CDD:202742, /region_name="Hemocyanin_C", /note="Hemocyanin, ig-like domain; pfam03723"; CDD:201186, /region_name="Hemocyanin_M", /note="Hemocyanin, copper containing domain; pfam00372".	http://www.ncbi.nlm.nih.gov/protein/EFA05755.1
TC015880	270016382	593	EFA12828.1		hypothetical protein TcasGA2_TC015880	CDD:163246, /region_name="laccase", /note="laccase, plant; TIGR03389"; CDD:209309, /region_name="COX2", /note="Cytochrome C oxidase subunit II, periplasmic domain; cl11412".	http://www.ncbi.nlm.nih.gov/protein/EFA12828.1
TC015880	91094561	566	XP_967121.1		similar to multicopper oxidase	CDD:163246, /region_name="laccase", /note="laccase, plant; TIGR03389"; CDD:209309, /region_name="COX2", /note="Cytochrome C oxidase subunit II, periplasmic domain; cl11412".	http://www.ncbi.nlm.nih.gov/protein/XP_967121.1	LOC655485	27aa shorter than TC.	>gi|270016382|gb|EFA12828.1| hypothetical protein TcasGA2_TC015880
14 in total except repeats

## Sheet: PO-Exp
Gene Name	s1-ctl_reads	s1-ctl_depth	s2-tthr_reads	s2-tthr_depth	s3-mthr_reads	s3-mthr_depth	s4-fthr_reads	s4-fthr_depth	s5-mabd_reads	s5-mabd_depth	s6-fabd_reads	s6-fabd_depth	FC(s3/s1)	FC(s4/s1)	FC(s5/s1)	FC(s6/s1)	FC(s2/s1)
TC000325	317	5.87896	219	4.06149	309	5.7306	351	6.50952	793	14.7067	198	3.67204	-0.036876	0.146988	1.32284	-0.678982	-0.533552
TC000821	770	13.9733	2061	37.4011	1898	34.4432	2041	37.0382	2173	39.4336	1192	21.6313	1.30155	1.40635	1.49676	0.630454	1.42041
TC005374	160	2.91188	52	0.94636	107	1.94732	114	2.07471	126	2.2931	61	1.11015	-0.580461	-0.489038	-0.344648	-1.39119	-1.62149
TC005375	94	1.69611	21	0.378917	24	0.433048	24	0.433048	53	0.956315	65	1.17284	-1.96963	-1.96963	-0.826669	-0.53222	-2.16227
TC005376	2059	34.8207	4860	82.1896	4649	78.6213	1283	21.6974	12125	205.051	5991	101.316	1.17498	-0.682423	2.55797	1.54085	1.23901
TC005377	1013	16.6641	1562	25.6952	627	10.3143	307	5.05022	2908	47.8372	1486	24.445	-0.692097	-1.72232	1.52139	0.5528	0.62476
TC006515	1470	26.4489	3402	61.2102	1847	33.232	2021	36.3627	498	8.96023	683	12.2888	0.329368	0.459253	-1.5616	-1.10586	1.21057
TC006769	1372	24.8622	3977	72.0677	3636	65.8884	1954	35.4087	6581	119.255	3136	56.8278	1.40607	0.51015	2.26203	1.19265	1.5354
TC010489	4697	82.8626	86258	1521.73	85149	1502.16	105542	1861.93	139482	2460.69	35974	634.639	4.18018	4.48993	4.8922	2.93714	4.19885
TC010490	19	0.908176	231	11.0415	183	8.74717	197	9.41635	206	9.84654	55	2.62893	3.26777	3.37412	3.43857	1.53343	3.60382
TC014907	913	16.9074	1471	27.2407	1137	21.0556	1238	22.9259	1594	29.5185	406	7.51852	0.316546	0.439325	0.803965	-1.16914	0.688111
TC015848	377	14.3403	520	19.7798	367	13.96	394	14.987	508	19.3233	126	4.79279	-0.0387844	0.0636311	0.430264	-1.58114	0.463947
TC015849	422	14.7254	966	33.708	706	24.6354	779	27.1827	996	34.7548	259	9.03765	0.742425	0.88438	1.2389	-0.704291	1.19478
TC015880	337	7.18631	455	9.70258	528	11.2593	492	10.4916	518	11.046	337	7.18631	0.647789	0.54591	0.620203	0	0.433118
14 in total except repeats
PS: the highlighted ones are the ones with higher reads in all the wild type glands

## Sheet: Per
TC-No.	GI	Length (aa)	Accession No.	EST?	Name	CDD	NCBI link	Gene Symbol	Remarks	Identical with GI, Accession No.
TC000751	91076750	747	XP_973386.1		similar to pxt CG7660-PB	CDD:209865, /region_name="An_peroxidase_like" /note="Animal heme peroxidases and related proteins; cl14561"; CDD:188655, /region_name="peroxinectin_like" /note="peroxinectin_like animal heme peroxidases; cd09823"	http://www.ncbi.nlm.nih.gov/protein/XP_973386.1	LOC662178	20aa longer than TC.
TC000751	270002787	727	EEZ99234.1		hypothetical protein TcasGA2_TC000751		http://www.ncbi.nlm.nih.gov/protein/EEZ99234.1
TC001071	270002824	243	EEZ99271.1	EST	hypothetical protein TcasGA2_TC001071; similar to putative peroxiredoxin	CDD:140280, /region_name="PTZ00253" /note="tryparedoxin peroxidase; Provisional"; CDD:48564, /region_name="PRX_Typ2cys" /note="Peroxiredoxin (PRX) family, Typical 2-Cys PRX subfamily; PRXs are thiol-specific antioxidant (TSA) proteins, which confer a protective role in cells through its peroxidase activity by reducing hydrogen peroxide, peroxynitrite, and organic hydroperoxides; cd03015".	http://www.ncbi.nlm.nih.gov/protein/EEZ99271.1		Conserved.	>gi|91077388|ref|XP_975268.1| PREDICTED: similar to putative peroxiredoxin
TC001556	91094043	1388	XP_968570.1		similar to peroxidasin		http://www.ncbi.nlm.nih.gov/protein/XP_968570.1			>gi|270004795|gb|EFA01243.1| peroxidasin
TC001556	270004795	1388	EFA01243.1		peroxidasin	CDD:209865, /region_name="An_peroxidase_like" /note="Animal heme peroxidases and related proteins; cl14561"; ……	http://www.ncbi.nlm.nih.gov/protein/EFA01243.1			>gi|91094043|ref|XP_968570.1| PREDICTED: similar to peroxidasin
TC001700	270015098	196	EFA11546.1		hypothetical protein TcasGA2_TC001700; similar to thiol peroxiredoxin	CDD:140280, /region_name="PTZ00253" /note="tryparedoxin peroxidase; Provisional"; CDD:48564, /region_name="PRX_Typ2cys" /note="Peroxiredoxin (PRX) family, Typical 2-Cys PRX subfamily; PRXs are thiol-specific antioxidant (TSA) proteins, which confer a protective role in cells through its peroxidase activity by reducing hydrogen peroxide, peroxynitrite, and organic hydroperoxides; cd03015".	http://www.ncbi.nlm.nih.gov/protein/EFA11546.1			>gi|91092234|ref|XP_970881.1| PREDICTED: similar to thiol peroxiredoxin
TC002498	189235882	1512	XP_970848.2		similar to dual oxidase 1	CDD:188652, /region_name="dual_peroxidase_like" /note="Dual oxidase and related animal heme peroxidases; cd09820"; ……	http://www.ncbi.nlm.nih.gov/protein/XP_970848.2	LOC659451	Conserved, 3aa shorter than TC. ChLG3:31535906..31575905	>gi|270004810|gb|EFA01258.1| hypothetical protein TcasGA2_TC002498
TC002498	270004810	1515	EFA01258.1		hypothetical protein TcasGA2_TC002498		http://www.ncbi.nlm.nih.gov/protein/EFA01258.1
TC004551	270002887	741	EEZ99334.1		hypothetical protein TcasGA2_TC004551		http://www.ncbi.nlm.nih.gov/protein/EEZ99334.1
TC004551	283046732	743	NP_001164313.1	VALIDATED REFSEQ	peroxidase precursor	CDD:209865, /region_name="An_peroxidase_like" /note="Animal heme peroxidases and related proteins; cl14561"; CDD:188655, /region_name="peroxinectin_like" /note="peroxinectin_like animal heme peroxidases; cd09823"	http://www.ncbi.nlm.nih.gov/protein/NP_001164313.1	LOC658096		>gi|270002887|gb|EEZ99334.1| hypothetical protein TcasGA2_TC004551
TC004579	91076232	761	XP_973018.1	EST	similar to oxidase/peroxidase	CDD:209865, /region_name="An_peroxidase_like" /note="Animal heme peroxidases and related proteins; cl14561"; CDD:188655, /region_name="peroxinectin_like" /note="peroxinectin_like animal heme peroxidases; cd09823"	http://www.ncbi.nlm.nih.gov/protein/XP_973018.1	LOC661785	11aa shorter than TC.
TC004579	270015112	772	EFA11560.1		hypothetical protein TcasGA2_TC004579		http://www.ncbi.nlm.nih.gov/protein/EFA11560.1
TC004592	270015113	951	EFA11561.1		hypothetical protein TcasGA2_TC004592	CDD:188652, /region_name="dual_peroxidase_like" /note="Dual oxidase and related animal heme peroxidases; cd09820"; ……	http://www.ncbi.nlm.nih.gov/protein/EFA11561.1
TC004592 + TC004593	189233992	1423	XP_971837.2		similar to Dual oxidase CG3131-PA		http://www.ncbi.nlm.nih.gov/protein/XP_971837.2	LOC660520
TC004593	270014559	405				CDD:99783, /region_name="NOX_Duox_like_FAD_NADP" /note="NADPH oxidase (NOX) catalyzes the generation of reactive oxygen species (ROS) such as superoxide and hydrogen peroxide. ROS were originally identified as bactericidal agents in phagocytes, but are now also implicated in cell signaling and metabolism. NOX...; cd06186".	http://www.ncbi.nlm.nih.gov/protein/270014559
TC004661	270015123	603	EFA11571.1	EST	hypothetical protein TcasGA2_TC004661; similar to AGAP010734-PA	CDD:209865, /region_name="An_peroxidase_like" /note="Animal heme peroxidases and related proteins; cl14561"; CDD:188655, /region_name="peroxinectin_like" /note="peroxinectin_like animal heme peroxidases; cd09823"	http://www.ncbi.nlm.nih.gov/protein/EFA11571.1			>gi|91075972|ref|XP_969523.1| PREDICTED: similar to AGAP010734-PA
TC005493	189240397	1443	XP_001807949.1		similar to oxidase/peroxidase	CDD:202533, /region_name="An_peroxidase" /note="Animal haem peroxidase; pfam03098"……	http://www.ncbi.nlm.nih.gov/protein/XP_001807949.1	LOC656619	Conserved. A bit different from TC.	>gi|270012708|gb|EFA09156.1| hypothetical protein TcasGA2_TC005493
TC005493	270012708	1466	EFA09156.1		hypothetical protein TcasGA2_TC005493		http://www.ncbi.nlm.nih.gov/protein/EFA09156.1
TC010354	91092040	198	XP_969867.1	EST	similar to glutathione peroxidase	CDD:48492, /region_name="GSH_Peroxidase", /note="Glutathione (GSH) peroxidase family; tetrameric selenoenzymes that catalyze the reduction of a variety of hydroperoxides including lipid peroxidases, using GSH as a specific electron donor substrate. GSH peroxidase contains one selenocysteine residue per...; cd00340"	http://www.ncbi.nlm.nih.gov/protein/XP_969867.1			>gi|270004921|gb|EFA01369.1| hypothetical protein TcasGA2_TC010354
TC010355	283046726	168	NP_001164309.1	VALIDATED REFSEQ	glutathione peroxidase	CDD:48492, /region_name="GSH_Peroxidase", /note="Glutathione (GSH) peroxidase family; tetrameric selenoenzymes that catalyze the reduction of a variety of hydroperoxides including lipid peroxidases, using GSH as a specific electron donor substrate. GSH peroxidase contains one selenocysteine residue per...; cd00340"	http://www.ncbi.nlm.nih.gov/protein/NP_001164309.1		Conserved.	>gi|270004922|gb|EFA01370.1| hypothetical protein TcasGA2_TC010355 [Tribolium castaneum]
TC010362	189235790	186	XP_969937.2		similar to glutathione peroxidase	CDD:48492, /region_name="GSH_Peroxidase", /note="Glutathione (GSH) peroxidase family; tetrameric selenoenzymes that catalyze the reduction of a variety of hydroperoxides including lipid peroxidases, using GSH as a specific electron donor substrate. GSH peroxidase contains one selenocysteine residue per...; cd00340"	http://www.ncbi.nlm.nih.gov/protein/XP_969937.2	LOC658456	Conserved. More exons than GLEAN.	>gi|270004924|gb|EFA01372.1| hypothetical protein TcasGA2_TC010362
TC011222	189241488	902	XP_973252.2		similar to GA19195-PA	CDD:209865, /region_name="An_peroxidase_like" /note="Animal heme peroxidases and related proteins; cl14561"; CDD:188655, /region_name="peroxinectin_like" /note="peroxinectin_like animal heme peroxidases; cd09823"	http://www.ncbi.nlm.nih.gov/protein/XP_973252.2	LOC662034	1aa shorter than TC.	>gi|270001273|gb|EEZ97720.1| hypothetical protein TcasGA2_TC011222
TC011222	270001273	903	EEZ97720.1		hypothetical protein TcasGA2_TC011222		http://www.ncbi.nlm.nih.gov/protein/EEZ97720.1
TC012328	270014285	233	EFA10733.1		hypothetical protein TcasGA2_TC012328, similar to peroxiredoxins, prx-1, prx-2, prx-3	CDD:140280, /region_name="PTZ00253" /note="tryparedoxin peroxidase; Provisional"; CDD:48564, /region_name="PRX_Typ2cys" /note="Peroxiredoxin (PRX) family, Typical 2-Cys PRX subfamily; PRXs are thiol-specific antioxidant (TSA) proteins, which confer a protective role in cells through its peroxidase activity by reducing hydrogen peroxide, peroxynitrite, and organic hydroperoxides; cd03015".	http://www.ncbi.nlm.nih.gov/protein/EFA10733.1		Conserved.	>gi|91090021|ref|XP_967356.1| PREDICTED: similar to peroxiredoxins, prx-1, prx-2, prx-3
TC014929	270009216	196	EFA05664.1	EST	hypothetical protein TcasGA2_TC014929; similar to peroxiredoxins, prx-1, prx-2, prx-3	CDD:140280, /region_name="PTZ00253" /note="tryparedoxin peroxidase; Provisional"; CDD:48564, /region_name="PRX_Typ2cys" /note="Peroxiredoxin (PRX) family, Typical 2-Cys PRX subfamily; PRXs are thiol-specific antioxidant (TSA) proteins, which confer a protective role in cells through its peroxidase activity by reducing hydrogen peroxide, peroxynitrite, and organic hydroperoxides; cd03015".	http://www.ncbi.nlm.nih.gov/protein/EFA05664.1		Conserved.	>gi|91085349|ref|XP_970797.1| PREDICTED: similar to peroxiredoxins, prx-1, prx-2, prx-3
TC015234	270009250	1076	EFA05698.1		hypothetical protein TcasGA2_TC015234	CDD:209865, /region_name="An_peroxidase_like" /note="Animal heme peroxidases and related proteins; cl14561"; CDD:188655, /region_name="peroxinectin_like" /note="peroxinectin_like animal heme peroxidases; cd09823"	http://www.ncbi.nlm.nih.gov/protein/EFA05698.1
18 in total except repeats

## Sheet: Per-Exp
Gene Name	s1-ctl_reads	s1-ctl_depth	s2-tthr_reads	s2-tthr_depth	s3-mthr_reads	s3-mthr_depth	s4-fthr_reads	s4-fthr_depth	s5-mabd_reads	s5-mabd_depth	s6-fabd_reads	s6-fabd_depth	FC(s3/s1)	FC(s4/s1)	FC(s5/s1)	FC(s6/s1)	FC(s2/s1)
TC000751	8	0.139194	136	2.3663	0	0	0	0	22	0.382784	6	0.104396	-	-	1.45943	-0.415031	4.08746
TC001071	690	35.8197	864	44.8525	595	30.888	612	31.7705	742	38.5191	1275	66.1885	-0.213707	-0.173065	0.104823	0.885829	0.324435
TC001556	1111	10.1315	85	0.775138	103	0.939285	63	0.574514	415	3.7845	1064	9.7029	-3.43114	-4.14036	-1.42068	-0.0623606	-3.70825
TC001700	2	0.128596	1	0.064298	4	0.257191	0	0	15	0.964467	2	0.128596	0.999994	-	2.90689	0	-1
TC002498	234	1.95514	171	1.42876	138	1.15303	118	0.985928	625	5.22208	526	4.3949	-0.761841	-0.987721	1.41735	1.16855	-0.452512
TC004551	4029	68.779	8513	145.325	5065	86.4645	3402	58.0755	4371	74.6173	8455	144.335	0.33014	-0.244039	0.117542	1.06938	1.07925
TC004579	213	3.4903	15	0.245796	22	0.3605	12	0.196636	32	0.524364	88	1.442	-3.27528	-4.14975	-2.73471	-1.27528	-3.82782
TC004592	825	10.9769	127	1.68978	42	0.558824	50	0.665266	40	0.532213	24	0.319328	-4.29593	-4.04439	-4.36632	-5.10329	-2.69957
TC004593	508	15.8489	252	7.86207	118	3.68145	161	5.02299	190	5.92775	75	2.3399	-2.10604	-1.65777	-1.41883	-2.75987	-1.0114
TC004661	1716	35.9868	8	0.16777	13	0.272627	18	0.377483	14	0.293598	9	0.188742	-7.04439	-6.57491	-6.93748	-7.57491	-7.74484
TC005493	932	8.04726	173	1.49375	137	1.18291	86	0.742559	320	2.76301	33740	291.325	-2.76615	-3.43792	-1.54226	5.17799	-2.42956
TC010354	245	15.5946	308	19.6047	206	13.1122	169	10.7571	234	14.8945	153	9.73869	-0.250137	-0.535759	-0.0662733	-0.67925	0.330149
TC010355	1207	90.4655	5519	413.653	2036	152.6	2002	150.051	3375	252.959	1402	105.081	0.754312	0.730016	1.48346	0.216061	2.19298
TC010362	1544	97.7867	5240	331.867	4673	295.957	4959	314.07	8300	525.667	3754	237.753	1.59768	1.68338	2.42644	1.28176	1.76289
TC011222	525	7.35619	90	1.26106	84	1.17699	20	0.280236	39	0.54646	419	5.87094	-2.64386	-4.71425	-3.75077	-0.325367	-2.54432
TC012328	1545	83.6325	2353	127.37	8537	462.117	9570	518.034	8048	435.647	3967	214.738	2.46612	2.63091	2.38102	1.36044	0.606894
TC014929	4080	262.335	7011	450.792	5337	343.157	5140	330.491	5492	353.124	4799	308.565	0.38746	0.333199	0.428762	0.234165	0.781051
TC015234	186	2.18756	37	0.435159	36	0.423398	26	0.305788	91	1.07026	45	0.529248	-2.36923	-2.83872	-1.03136	-2.04731	-2.32971
18 in total except repeats
PS: the highlighted ones are the ones with higher reads in all the wild type glands
